# Supplementary material for: Anti-SARS-CoV-2 Antibody Status at the Time of Hospital Admission and the Prognosis of Patients with COVID-19: A Prospective Observational Study
Source: MDPI journal article supplement (doi:10.3390/idr14060100), 2022-12-11
Supplement: s1 [file s1]

**Supplementary Table S1.** Kolmogorov-Smirnov test for normal distribution of quantitative variables obtained at the time of admission in the characteristics of the cohort of patients with positive anti-S-SARS-CoV-2 immunoglobulins and cohort of patients with negative anti-S-SARS-CoV-2 immunoglobulins.

|                                          | <b>anti-SARS-CoV-2 Ig positive<br/>p-value (KS – test)</b> | <b>anti-SARS-CoV-2 Ig<br/>Negative<br/>p-value (KS – test)</b> |
|------------------------------------------|------------------------------------------------------------|----------------------------------------------------------------|
| Age (years)                              | 0.268                                                      | 0.246                                                          |
| BMI (kg.m <sup>-2</sup> )                | 0.0001                                                     | 0.005                                                          |
| CRP (mg/L)                               | 0.024                                                      | 0.012                                                          |
| IL-6 (pg/mL)                             | 0.0001                                                     | 0.0001                                                         |
| N/L ratio                                | 0.0001                                                     | 0.0001                                                         |
| GFR (ml/min)                             | 0.015                                                      | 0.265                                                          |
| D-dimer (mg/L)                           | 0.0001                                                     | 0.0001                                                         |
| Duration of symptoms to admission (days) | 0.0001                                                     | 0.0001                                                         |
| Hospitalisation length (days)            | 0.0001                                                     | 0.0001                                                         |
| Length of follow up (days)               | 0.0001                                                     | 0.0001                                                         |
| Survival in deceased patients (Days)     | 0.0001                                                     | 0.0001                                                         |

BMI: body mass index; CRP: C-reactive protein; GFR: glomerular filtration rate; IL-6: interleukin 6; n: number, KS - test: Kolmogorov-Smirnov test; N/L ratio: neutrophil-to-lymphocyte ratio; p-value: probability

**Supplementary Table S2:** Binary logistic regression model – forward stepwise method of association of in-hospital death with anti-S SARS-CoV-2 negativity and other variables. Variables in the equation of regression model.

|        |                            | Beta    | Beta SE  | Wald    | p-value | OR    | Lower 95% CI | Upper 95% CI |
|--------|----------------------------|---------|----------|---------|---------|-------|--------------|--------------|
| Step 1 | Comorbidity number (n)     | 0.723   | 0.136    | 28.326  | 0.000   | 2.061 | 1.579        | 2.689        |
|        | Constant                   | -2.890  | 0.255    | 128.897 | 0.000   | 0.056 |              |              |
| Step 2 | Moderate disease           |         |          | 20.893  | 0.000   |       |              |              |
|        | Severe disease             | -21.212 | 5007.119 | 0.000   | 0.997   | 0.000 | 0.000        |              |
|        | Critical disease           | -2.240  | 0.490    | 20.893  | 0.000   | 9.433 | 3.600        | 24.392       |
|        | Comorbidity number (n)     | 0.759   | 0.146    | 26.877  | 0.000   | 2.136 | 1.603        | 2.846        |
|        | Constant                   | -.768   | .472     | 2.652   | .103    | .464  |              |              |
| Step 3 | Moderate disease           |         |          | 13.190  | 0.001   |       |              |              |
|        | Severe disease             | -20.850 | 4906.200 | 0.000   | 0.997   | 0.000 | 0.000        |              |
|        | Critical disease           | -1.877  | 0.517    | 13.190  | 0.000   | 6.536 | 2.381        | 17.857       |
|        | Comorbidity number (n)     | 0.756   | 0.149    | 25.844  | 0.000   | 2.130 | 1.592        | 2.852        |
|        | Anti-S SARS-CoV-2 negative | 1.242   | 0.347    | 12.776  | 0.000   | 3.461 | 1.752        | 6.837        |
|        | Constant                   | -1.751  | 0.577    | 9.219   | 0.002   | 0.174 |              |              |
| Step 4 | Moderate disease           |         |          | 13.170  | 0.001   |       |              |              |
|        | Severe disease             | -21.081 | 4775.218 | 0.000   | 0.996   | 0.000 | 0.000        |              |
|        | Critical disease           | -1.954  | 0.538    | 13.170  | 0.0001  | 7.042 | 2.457        | 20.408       |
|        | Comorbidity number (n)     | 0.483   | 0.164    | 8.620   | 0.003   | 1.621 | 1.174        | 2.237        |
|        | Age (years)                | 0.056   | 0.017    | 10.942  | 0.001   | 1.058 | 1.023        | 1.093        |
|        | Anti-S SARS-CoV-2 negative | 1.205   | 0.353    | 11.671  | 0.001   | 3.336 | 1.671        | 6.659        |
|        | Constant                   | -4.899  | 1.142    | 18.393  | 0.000   | 0.007 |              |              |
| Step 5 | Moderate disease           |         |          | 12.694  | 0.002   |       |              |              |
|        | Severe disease             | -21.120 | 4748.158 | 0.000   | 0.996   | 0.000 | 0.000        |              |
|        | Critical disease           | -1.957  | 0.549    | 12.694  | 0.0001  | 7.460 | 2.475        | 22.222       |
|        | D-dimer (mg/l)             | 0.092   | 0.046    | 4.037   | 0.045   | 1.096 | 1.002        | 1.199        |
|        | Comorbidity number (n)     | 0.496   | 0.166    | 8.956   | 0.003   | 1.641 | 1.186        | 2.271        |
|        | Age (years)                | 0.053   | 0.017    | 9.669   | 0.002   | 1.055 | 1.020        | 1.091        |
|        | Anti-S SARS-CoV-2 negative | 1.240   | 0.357    | 12.066  | 0.001   | 3.457 | 1.717        | 6.961        |
|        | Constant                   | -4.923  | 1.151    | 18.281  | 0.000   | 0.007 |              |              |

A forward stepwise method (probability for stepwise: entry  $p < 0.05$ ) for binary logistic regression has been used to reduce the number of independent variables entering the model to reduce the probability of model overfitting. CI: confidence interval; n: number; OR: odds ratio; p-value: probability (multivariate), SE: standard error.

**Supplementary Table S3:** Binary logistic regression model – forward stepwise method of association of in-hospital death with anti-S SARS-CoV-2 negativity and other variables. Variables not in the equation of regression model.

|        |                             | Score  | p-value |
|--------|-----------------------------|--------|---------|
| Step 1 | Age (years)                 | 11.282 | 0.001   |
|        | Duration of symptoms (days) | 0.684  | 0.408   |
|        | Baricitinib                 | 3.821  | 0.051   |
|        | Anti-S SARS-CoV-2 negative  | 20.893 | 0.000   |
|        | BMI (kg.m <sup>-2</sup> )   | 0.067  | 0.795   |
|        | CRP (mg/L)                  | 6.002  | 0.014   |
|        | IL-6 (pg/mL)                | 2.566  | 0.109   |
|        | N/L ratio                   | 6.800  | 0.009   |
|        | D-dimer (mg/L)              | 3.430  | 0.064   |
|        | Severity                    | 26.007 | 0.000   |
| Step 2 | Age (years)                 | 14.200 | 0.000   |
|        | Duration of symptoms (days) | 1.440  | 0.230   |
|        | Baricitinib                 | 0.686  | 0.407   |
|        | Anti-S SARS-CoV-2 negative  | 14.200 | 0.000   |
|        | BMI (kg.m <sup>-2</sup> )   | 0.006  | 0.938   |
|        | CRP (mg/L)                  | 2.392  | 0.122   |
|        | IL-6 (pg/mL)                | 1.108  | 0.293   |
|        | N/L ratio                   | 5.882  | 0.015   |
|        | D-dimer (mg/L)              | 5.513  | 0.019   |
| Step 3 | Age                         | 13.024 | 0.000   |
|        | Duration of symptoms (days) | 2.218  | 0.136   |
|        | Baricitinib                 | 0.083  | 0.774   |
|        | BMI (kg.m <sup>-2</sup> )   | 0.133  | 0.715   |
|        | CRP (mg/L)                  | 4.827  | 0.028   |
|        | IL-6 (pg/mL)                | 2.040  | 0.153   |
|        | N/L ratio                   | 7.201  | 0.007   |
|        | D-dimer (mg/L)              | 6.088  | 0.014   |
| Step 4 | Duration of symptoms (days) | 1.617  | 0.204   |
|        | Baricitinib                 | 0.334  | 0.563   |
|        | BMI (kg.m <sup>-2</sup> )   | 0.522  | 0.470   |
|        | CRP (mg/L)                  | 4.118  | 0.042   |
|        | IL-6 (pg/mL)                | 1.456  | 0.228   |
|        | N/L-ratio                   | 4.003  | 0.045   |
|        | D-dimer (mg/L)              | 4.942  | 0.026   |
| Step 5 | Duration of symptoms (days) | 1.598  | 0.206   |
|        | Baricitinib                 | 0.450  | 0.502   |
|        | BMI (kg.m <sup>-2</sup> )   | 0.554  | 0.457   |
|        | CRP (mg/L)                  | 2.840  | 0.092   |
|        | IL-6 (pg/mL)                | 0.912  | 0.339   |
|        | N/L ratio                   | 3.507  | 0.061   |

BMI: body mass index; CRP: C-reactive protein; IL-6: interleukin 6; n: number, N/L ratio: neutrophil-to-lymphocyte ratio; OR: odds ratio; p-value: probability (univariate)

**Supplementary Table S4:** Binary logistic regression model – forward stepwise method of association of in-hospital death with anti-S SARS-CoV-2 IgM negativity and other variables. Variables in the equation of regression model.

|        |                                | Beta    | Beta SE  | Wald    | p-value | OR    | Lower 95% CI | Upper 95% CI |
|--------|--------------------------------|---------|----------|---------|---------|-------|--------------|--------------|
| Step 1 | Comorbidity number (n)         | 0.752   | 0.138    | 29.845  | 0.000   | 2.121 | 1.619        | 2.777        |
|        | Constant                       | -2.936  | 0.260    | 127.826 | 0.000   | 0.053 |              |              |
| Step 2 | Moderate disease               |         |          | 21.126  | 0.000   |       |              |              |
|        | Severe disease                 | -21.228 | 5030.084 | 0.000   | 0.997   | 0.000 | 0.000        |              |
|        | Critical disease               | -2.269  | 0.494    | 21.126  | 0.000   | 9.708 | 3.676        | 25.64        |
|        | Comorbidity number (n)         | 0.794   | 0.149    | 28.421  | 0.000   | 2.212 | 1.652        | 2.962        |
|        | Constant                       | -0.802  | 0.474    | 2.862   | 0.091   | 0.449 |              |              |
| Step 3 | Moderate disease               |         |          | 12.831  | 0.002   |       |              |              |
|        | Severe disease                 | -20.849 | 4921.019 | 0.000   | 0.997   | 0.000 | 0.000        |              |
|        | Critical disease               | -1.873  | 0.523    | 12.831  | 0.0001  | 6.493 | 2.336        | 18.182       |
|        | Anti-S SARS-CoV-2 IgM negative | 1.396   | 0.361    | 14.992  | 0.0001  | 4.041 | 1.993        | 8.194        |
|        | Comorbidity number (n)         | 0.777   | 0.151    | 26.376  | 0.0001  | 2.176 | 1.617        | 2.927        |
|        | Constant                       | -1.900  | 0.588    | 10.432  | 0.001   | 0.150 |              |              |
|        |                                |         |          |         |         |       |              |              |
| Step 4 | Age (years)                    | 0.062   | 0.018    | 12.465  | 0.0001  | 1.064 | 1.028        | 1.101        |
|        | Moderate disease               |         |          | 13.039  | 0.001   |       |              |              |
|        | Severe disease                 | -21.119 | 4769.362 | 0.000   | 0.996   | 0.000 | 0.000        |              |
|        | Critical disease               | -1.983  | 0.549    | 13.039  | 0.0001  | 7.246 | 2.475        | 21.277       |
|        | Anti-S SARS-CoV-2 IgM negative | 1.335   | 0.366    | 13.277  | 0.0001  | 3.801 | 1.853        | 7.795        |
|        | Comorbidity number (n)         | 0.483   | 0.168    | 8.324   | 0.004   | 1.622 | 1.168        | 2.252        |
|        | Constant                       | -5.370  | 1.179    | 20.761  | 0.0001  | 0.005 |              |              |
| Step 5 | Age (years)                    | 0.059   | 0.018    | 11.171  | 0.001   | 1.061 | 1.025        | 1.098        |
|        | Moderate disease               |         |          | 12.623  | 0.002   |       |              |              |
|        | Severe disease                 | -21.165 | 4740.599 | 0.000   | 0.996   | 0.000 | 0.000        |              |
|        | Critical disease               | -1.990  | 0.560    | 12.623  | 0.0001  | 7.299 | 2.439        | 21.739       |
|        | Anti-S SARS-CoV-2 IgM negative | 1.385   | 0.372    | 13.846  | 0.0001  | 3.994 | 1.926        | 8.284        |
|        | D-dimer (mg/L)                 | 0.096   | 0.046    | 4.227   | 0.040   | 1.100 | 1.004        | 1.205        |
|        | Comorbidity number (n)         | 0.495   | 0.169    | 8.612   | 0.003   | 1.641 | 1.179        | 2.283        |
| Step 6 | Constant                       | -5.412  | 1.189    | 20.724  | 0.0001  | 0.004 |              |              |
|        | Age (years)                    | 0.055   | 0.018    | 9.306   | 0.002   | 1.056 | 1.020        | 1.094        |
|        | Moderate disease               |         |          | 11.703  | 0.003   |       |              |              |
|        | Severe disease                 | -21.077 | 4700.488 | 0.000   | 0.996   | 0.000 | 0.000        |              |
|        | Critical disease               | -1.909  | 0.558    | 11.703  | 0.001   | 6.757 | 2.257        | 20.000       |
|        | Anti-S SARS-CoV-2 IgM negative | 1.513   | 0.387    | 15.261  | 0.0001  | 4.542 | 2.126        | 9.706        |
|        | N/L-ratio                      | 0.042   | 0.021    | 4.034   | 0.045   | 1.043 | 1.001        | 1.086        |
|        | D-dimer (mg/L)                 | 0.092   | 0.047    | 3.815   | 0.051   | 1.096 | 1.000        | 1.202        |

|  |                        |        |       |        |        |       |       |       |
|--|------------------------|--------|-------|--------|--------|-------|-------|-------|
|  | Comorbidity number (n) | 0.500  | 0.171 | 8.555  | 0.003  | 1.649 | 1.179 | 2.305 |
|  | Constant               | -5.653 | 1.219 | 21.489 | 0.0001 | 0.004 |       |       |

A forward stepwise method (probability for stepwise: entry  $p < 0.05$ ) for binary logistic regression been used to reduce the number of independent variables entering the model to reduce the probability of model overfitting. CI: confidence interval; n: number, OR: odds ratio; , N/L ratio: neutrophil-to-lymphocyte ratio; p-value: probability (multivariate), SE: standard error.

**Supplementary Table S5:** Binary logistic regression model – forward stepwise method of association of in-hospital death with anti-S SARS-CoV-2 IgM negativity and other variables. Variables not in the equation of regression model.

|        |                                | Score  | p-value |
|--------|--------------------------------|--------|---------|
| Step 1 | Age (years)                    | 12.783 | 0.0001  |
|        | Duration of symptoms (days)    | 0.694  | 0.405   |
|        | Moderate disease               | 38.585 | 0.0001  |
|        | Severe disease                 | 8.154  | 0.004   |
|        | Critical disease               | 0.871  | 0.351   |
|        | Anti-S SARS-CoV-2 IgM negative | 23.194 | 0.000   |
|        | BMI (kg.m <sup>-2</sup> )      | 0.082  | 0.774   |
|        | IL-6 (pg/mL)                   | 2.549  | 0.110   |
|        | CRP (mg/L)                     | 6.043  | 0.014   |
|        | N/L ratio                      | 5.891  | 0.015   |
|        | D-dimer (mg/L)                 | 9.502  | 0.002   |
|        | Baricitinib                    | 3.482  | 0.062   |
| Step 2 | Age (years)                    | 15.059 | 0.0001  |
|        | Duration of symptoms (days)    | 1.431  | 0.232   |
|        | Anti-S SARS-CoV-2 IgM negative | 16.508 | 0.0001  |
|        | BMI (kg.m <sup>-2</sup> )      | 0.009  | 0.925   |
|        | IL-6 (pg/mL)                   | 1.253  | 0.263   |
|        | CRP (mg/L)                     | 2.232  | 0.135   |
|        | N/L ratio                      | 4.929  | 0.026   |
|        | D-dimer (mg/L)                 | 5.674  | 0.017   |
|        | Baricitinib                    | 0.596  | 0.440   |
| Step 3 | Age (years)                    | 13.128 | 0.0001  |
|        | Duration of symptoms (days)    | 2.212  | 0.137   |
|        | BMI (kg.m <sup>-2</sup> )      | 0.255  | 0.614   |
|        | IL-6 (pg/mL)                   | 2.623  | 0.105   |
|        | CRP (mg/L)                     | 5.042  | 0.025   |
|        | N/L ratio                      | 7.605  | 0.006   |
|        | D-dimer (mg/L)                 | 5.842  | 0.016   |
|        | Baricitinib                    | 0.110  | 0.741   |
| Step 4 | Duration of symptoms (days)    | 1.572  | 0.210   |
|        | BMI (kg.m <sup>-2</sup> )      | 0.264  | 0.607   |
|        | IL-6 (pg/mL)                   | 2.202  | 0.138   |
|        | CRP (mg/L)                     | 4.231  | 0.040   |
|        | N/L ratio                      | 4.340  | 0.037   |
|        | D-dimer (mg/L)                 | 4.369  | 0.037   |
|        | Baricitinib                    | 0.454  | 0.501   |
| Step 5 | Duration of symptoms (days)    | 1.531  | 0.216   |
|        | BMI (kg.m <sup>-2</sup> )      | 0.256  | 0.613   |

|        |                             |       |       |
|--------|-----------------------------|-------|-------|
| Step 6 | IL-6 (pg/mL)                | 2.073 | 0.150 |
|        | CRP (mg/L)                  | 2.835 | 0.092 |
|        | N/L ratio                   | 4.002 | 0.045 |
|        | Baricitinib                 | 0.667 | 0.414 |
|        | Duration of symptoms (days) | 1.507 | 0.220 |
|        | BMI (kg.m <sup>-2</sup> )   | 0.383 | 0.536 |
|        | IL-6 (pg/mL)                | 1.576 | 0.209 |
|        | CRP (mg/L)                  | 0.643 | 0.423 |
|        | Baricitinib                 | 0.764 | 0.382 |

BMI: body mass index; CRP: C-reactive protein; IL-6: interleukin 6; n: number, N/L ratio: neutrophil-to-lymphocyte ratio; p-value: probability (univariate)

**Supplementary Table S6:** Binary logistic regression model – forward stepwise method of association of in-hospital death with anti-S SARS-CoV-2 IgG negativity and other variables. Variables in the equation of regression model.

|        |                                | Beta    | Beta SE  | Wald    | p-value | OR     | Lower 95% CI | Upper 95% CI |
|--------|--------------------------------|---------|----------|---------|---------|--------|--------------|--------------|
| Step 1 | Comorbidity number (n)         | 0.752   | 0.138    | 29.845  | 0.0001  | 2.121  | 1.619        | 2.777        |
|        | Constant                       | -2.936  | 0.260    | 127.826 | 0.0001  | 0.053  |              |              |
| Step 2 | Moderate disease               |         |          | 21.126  | 0.0001  |        |              |              |
|        | Severe disease                 | -21.228 | 5030.084 | 0.000   | 0.997   | 0.000  | 0.000        |              |
|        | Critical disease               | -2.269  | 0.494    | 21.126  | 0.0001  | 9.708  | 3.676        | 25.641       |
|        | Comorbidity number (n)         | 0.794   | 0.149    | 28.421  | 0.0001  | 2.212  | 1.652        | 2.962        |
|        | Constant                       | -.802   | 0.474    | 2.862   | 0.091   | .449   |              |              |
| Step 3 | Age (years)                    | 0.066   | 0.017    | 14.284  | 0.0001  | 1.068  | 1.032        | 1.105        |
|        | Moderate disease               |         |          | 20.592  | 0.0001  |        |              |              |
|        | Severe disease                 | -21.499 | 4853.950 | 0.000   | 0.996   | 0.000  | 0.000        |              |
|        | Critical disease               | -2.408  | 0.531    | 20.592  | 0.0001  | 11.111 | 3.922        | 31.250       |
|        | Comorbidity number (n)         | 0.498   | 0.161    | 9.509   | 0.002   | 1.645  | 1.199        | 2.258        |
|        | Constant                       | -4.530  | 1.126    | 16.187  | 0.0001  | 0.011  |              |              |
| Step 4 | Age (years)                    | 0.068   | 0.018    | 14.915  | 0.0001  | 1.070  | 1.034        | 1.108        |
|        | Moderate disease               |         |          | 16.709  | 0.0001  |        |              |              |
|        | Severe disease                 | -21.326 | 4770.738 | 0.000   | 0.996   | 0.000  | 0.000        |              |
|        | Critical disease               | -2.230  | 0.545    | 16.709  | 0.0001  | 9.259  | 3.195        | 27.027       |
|        | Comorbidity number (n)         | 0.492   | 0.168    | 8.548   | 0.003   | 1.635  | 1.176        | 2.273        |
|        | Anti-S SARS-CoV-2 IgG negative | 1.049   | 0.382    | 7.532   | 0.006   | 2.855  | 1.350        | 6.039        |
| Step 5 | Constant                       | -5.509  | 1.208    | 20.793  | 0.0001  | 0.004  |              |              |
|        | Age (years)                    | 0.065   | 0.018    | 13.377  | 0.0001  | 1.067  | 1.031        | 1.105        |
|        | Moderate disease               |         |          | 16.200  | 0.0001  |        |              |              |
|        | Severe disease                 | -21.373 | 4746.051 | 0.000   | 0.996   | 0.000  | 0.000        |              |
|        | Critical disease               | -2.244  | 0.558    | 16.200  | 0.0001  | 9.434  | 3.165        | 27.778       |
|        | Comorbidity number (n)         | 0.094   | 0.046    | 4.142   | 0.042   | 1.099  | 1.003        | 1.203        |
|        | D-dimer (mg/L)                 | 0.505   | 0.170    | 8.871   | 0.003   | 1.657  | 1.188        | 2.310        |
|        | Anti-S SARS-CoV-2 IgG negative | 1.093   | 0.389    | 7.908   | 0.005   | 2.983  | 1.393        | 6.388        |
|        | Constant                       | -5.527  | 1.217    | 20.610  | 0.0001  | 0.004  |              |              |

A forward stepwise method (probability for stepwise: entry  $p < 0.05$ ) for binary logistic regression and has been used to reduce the number of independent variables entering the model to reduce the probability of model overfitting.

CI: confidence interval; n: number; OR: odds ratio; p-value: probability (multivariate), SE: standard error.

**Supplementary Table S7:** Binary logistic regression model – forward stepwise method of association of in-hospital death with anti-S SARS-CoV-2 IgG negativity and other variables. Variables not in the equation of regression model.

|        |                             | Score  | p-value |
|--------|-----------------------------|--------|---------|
| Step 1 | Age (years)                 | 12.783 | 0.0001  |
|        | Duration of symptoms (days) | 0.694  | 0.405   |
|        | Moderate disease            | 38.585 | 0.0001  |
|        | Severe disease              | 8.154  | 0.004   |
|        | Critical disease            | 0.871  | 0.351   |

|        |                                |        |        |
|--------|--------------------------------|--------|--------|
|        | BMI (kg.m <sup>-2</sup> )      | 0.082  | 0.774  |
|        | IL6 (ng/l)                     | 2.549  | 0.110  |
|        | CRP (mg/l)                     | 6.043  | 0.014  |
|        | N/L ratio                      | 5.891  | 0.015  |
|        | D-Dimer (mg/l)                 | 9.502  | 0.002  |
|        | Baricitnib                     | 3.482  | 0.062  |
|        | Anti-S SARS-CoV-2 IgG negative | 10.427 | 0.001  |
| Step 2 | Age (years)                    | 15.059 | 0.0001 |
|        | Duration of symptoms (days)    | 1.431  | 0.232  |
|        | BMI (kg.m <sup>-2</sup> )      | 0.009  | 0.925  |
|        | IL6 (ng/l)                     | 1.253  | 0.263  |
|        | CRP (mg/l)                     | 2.232  | 0.135  |
|        | N/L ratio                      | 4.929  | 0.026  |
|        | D-Dimer (mg/l)                 | 5.674  | 0.017  |
|        | Baricitinib                    | 0.596  | 0.440  |
|        | Anti-S SARS-CoV-2 IgG negative | 7.177  | 0.007  |
| Step 3 | Duration of symptoms (days)    | 0.958  | 0.328  |
|        | BMI (kg.m <sup>-2</sup> )      | 1.089  | 0.297  |
|        | IL6 (ng/l)                     | 1.097  | 0.295  |
|        | CRP (mg/l)                     | 2.017  | 0.156  |
|        | N/L ratio                      | 2.291  | 0.130  |
|        | D-Dimer (mg/l)                 | 3.402  | 0.065  |
|        | Baricitinib                    | 1.433  | 0.231  |
|        | Anti-S SARS-CoV-2 IgG negative | 7.934  | 0.005  |
| Step 4 | Duration of symptoms (days)    | 1.285  | 0.257  |
|        | BMI (kg.m <sup>-2</sup> )      | 0.869  | 0.351  |
|        | IL6 (ng/l)                     | 1.892  | 0.169  |
|        | CRP (mg/l)                     | 3.219  | 0.073  |
|        | N/L ratio                      | 3.268  | 0.071  |
|        | D-Dimer (mg/l)                 | 4.104  | 0.043  |
|        | Baricitinib                    | 0.376  | 0.540  |
| Step 5 | Duration of symptoms (days)    | 1.253  | 0.263  |
|        | BMI (kg.m <sup>-2</sup> )      | 0.963  | 0.326  |
|        | IL6 (ng/l)                     | 1.719  | 0.190  |
|        | CRP (mg/l)                     | 2.017  | 0.156  |
|        | N/L ratio                      | 2.943  | 0.086  |
|        | Baricitinib                    | 0.574  | 0.449  |

BMI: body mass index; CRP: C-reactive protein; IL-6: interleukin 6; n: number, N/L ratio: neutrophil-to-lymphocyte ratio; p-value: probability (univariate)



**Supplementary Table S8:** Cox regression model – forward stepwise method of association of in-hospital death with anti-S SARS-CoV-2 negativity and other variables. Variables in the equation of regression model.

|        |                            | Beta  | Beta SE | Wald  | p-value | OR    | Lower 95% CI | Upper 95% CI |
|--------|----------------------------|-------|---------|-------|---------|-------|--------------|--------------|
| Step 1 | Age (years)                | 0.046 | 0.021   | 4.819 | 0.028   | 1.047 | 1.005        | 1.092        |
| Step 2 | Age (years)                | 0.047 | 0.021   | 4.969 | 0.026   | 1.048 | 1.006        | 1.092        |
|        | Anti-S SARS-CoV-2 negative | 1.034 | 0.484   | 4.577 | 0.032   | 2.814 | 1.091        | 7.258        |

A forward stepwise method (probability for stepwise: entry  $p < 0.05$ ) for Cox regression has been used to reduce the number of independent variables entering the model to reduce the probability of model overfitting.

CI: confidence interval; n: number; OR: odds ratio; p-value: probability (multivariate), SE: standard error.

**Supplementary Table S9:** Cox regression model – forward stepwise method of association of in-hospital death with anti-S SARS-CoV-2 negativity and other variables. Variables not in the equation of regression model.

|        |                            | Score | p-value |
|--------|----------------------------|-------|---------|
| Step 1 | Moderate disease           | 5.460 | 0.065   |
|        | Severe disease             | 0.399 | 0.528   |
|        | Critical disease           | 2.252 | 0.133   |
|        | BMI (kg.m <sup>-2</sup> )  | 1.988 | 0.159   |
|        | IL6 (ng/l)                 | 0.127 | 0.722   |
|        | CRP (mg/l)                 | 0.016 | 0.899   |
|        | N/L ratio                  | 1.152 | 0.283   |
|        | D-Dimer (mg/l)             | 0.010 | 0.921   |
|        | Comorbidity number (n)     | 0.363 | 0.547   |
|        | Baricitnib                 | 0.340 | 0.560   |
|        | Anti-S SARS-CoV-2 negative | 5.000 | 0.025   |
| Step 2 | Moderate disease           | 3.879 | 0.144   |
|        | Severe disease             | 0.255 | 0.614   |
|        | Critical disease           | 1.674 | 0.196   |
|        | BMI (kg.m <sup>-2</sup> )  | 2.573 | 0.109   |
|        | IL6 (ng/l)                 | 0.492 | 0.483   |
|        | CRP (mg/l)                 | 0.000 | 0.984   |
|        | N/L ratio                  | 2.411 | 0.120   |
|        | D-Dimer (mg/l)             | 0.106 | 0.745   |
|        | Comorbidity number (n)     | 0.473 | 0.491   |
|        | Baricitnib                 | 0.112 | 0.738   |

BMI: body mass index; CRP: C-reactive protein; IL-6: interleukin 6; n: number, N/L ratio: neutrophil-to-lymphocyte ratio; p-value: probability (univariate), SE: standard error.

**Supplementary Table S10:** Cox regression model – forward stepwise method of association of in-hospital death with anti-S SARS-CoV-2 IgM negativity and other variables. Variables in the equation of regression model.

|        |                                | Beta  | Beta SE | Wald  | p - value | OR    | Lower 95% CI | Upper 95% CI |
|--------|--------------------------------|-------|---------|-------|-----------|-------|--------------|--------------|
| Step 1 | Age (years)                    | 0.046 | 0.021   | 4.819 | 0.028     | 1.047 | 1.005        | 1.092        |
| Step 2 | Age (years)                    | 0.045 | 0.020   | 4.838 | 0.028     | 1.046 | 1.005        | 1.089        |
|        | Anti-S SARS-CoV-2 IgM negative | 1.003 | 0.484   | 4.304 | 0.038     | 2.728 | 1.057        | 7.039        |

A forward stepwise method (probability for stepwise: entry  $p < 0.05$ ) for Cox regression has been used to reduce the number of independent variables entering the model to reduce the probability of model overfitting.

CI: confidence interval; IgM: immunoglobulin M, n: number, N/L ratio: neutrophil-to-lymphocyte ratio; OR: odds ratio; p-value: probability, SE: standard error.

**Supplementary Table S11:** Cox regression model – forward stepwise method of association of in-hospital death with anti-S SARS-CoV-2 IgM negativity and other variables. Variables not in the equation of regression model.

|        |                                | Score | p-value |
|--------|--------------------------------|-------|---------|
| Step 1 | Moderate disease               | 5,460 | 0,065   |
|        | Severe disease                 | 0,399 | 0,528   |
|        | Critical disease               | 2,252 | 0,133   |
|        | BMI (kg.m <sup>-2</sup> )      | 1,988 | 0,159   |
|        | IL6 (ng/l)                     | 0,127 | 0,722   |
|        | CRP (mg/l)                     | 0,016 | 0,899   |
|        | N/L ratio                      | 1,152 | 0,283   |
|        | D-Dimer (mg/l)                 | 0,010 | 0,921   |
|        | Comorbidity number (n)         | 0,363 | 0,547   |
|        | Baricitnib                     | 0,340 | 0,560   |
|        | Anti-S SARS-CoV-2 IgM negative | 4,676 | 0,031   |
| Step 2 | Moderate disease               | 3,932 | 0,140   |
|        | Severe disease                 | 0,223 | 0,637   |
|        | Critical disease               | 1,601 | 0,206   |
|        | BMI (kg.m <sup>-2</sup> )      | 2,606 | 0,106   |
|        | CRP (mg/l)                     | 0,602 | 0,438   |
|        | IL6 (ng/l)                     | 0,000 | 0,988   |
|        | N/L ratio                      | 3,438 | 0,064   |
|        | D-Dimer (mg/l)                 | 0,127 | 0,721   |
|        | Comorbidity number (n)         | 0,345 | 0,557   |
|        | Baricitnib                     | 0,178 | 0,673   |

BMI: body mass index; CRP: C-reactive protein; IgM: immunoglobulin M, IL-6: interleukin 6; n: number, N/L ratio: neutrophil-to-lymphocyte ratio; p-value: probability (univariate), SE: standard error

**Supplementary Table S12:** Cox regression model – forward stepwise method of association of in-hospital death with anti-S SARS-CoV-2 IgG negativity and other variables. Variables in the equation of regression model.

|        |                                | Beta  | Beta SE | Wald  | p - value | OR    | Lower 95% CI | Upper 95% CI |
|--------|--------------------------------|-------|---------|-------|-----------|-------|--------------|--------------|
| Step 1 | Age (years)                    | 0.046 | 0.021   | 4.819 | 0.028     | 1.047 | 1.005        | 1.092        |
| Step 2 | Age (years)                    | 0.051 | 0.021   | 5.774 | 0.016     | 1.052 | 1.009        | 1.097        |
|        | Anti-S SARS-CoV-2 IgG negative | 1.215 | 0.569   | 4.561 | 0.033     | 3.369 | 1.105        | 10.270       |

A forward stepwise method (probability for stepwise: entry  $p < 0.05$ ) for Cox regression has been used to reduce the number of independent variables entering the model to reduce the probability of model overfitting.

BMI: body mass index; CI: confidence interval; IgG: immunoglobulin G, n: number; OR: odds ratio; p-value: probability (multivariate), SE: standard error.

**Supplementary Table S13:** Cox regression model – forward stepwise method of association of in-hospital death with anti-S SARS-CoV-2 IgG negativity and other variables. Variables not in the equation of regression model.

|        |                                | Score | p-value |
|--------|--------------------------------|-------|---------|
| Step 1 | Moderate disease               | 5.460 | 0.065   |
|        | Severe disease                 | 0.399 | 0.528   |
|        | Critical disease               | 2.252 | 0.133   |
|        | BMI (kg.m <sup>-2</sup> )      | 1.988 | 0.159   |
|        | CRP (mg/l)                     | 0.127 | 0.722   |
|        | IL6 (ng/l)                     | 0.016 | 0.899   |
|        | N/L ratio                      | 1.152 | 0.283   |
|        | D-Dimer (mg/l)                 | 0.010 | 0.921   |
|        | Comorbidity number (n)         | 0.363 | 0.547   |
|        | Baricitnib                     | 0.340 | 0.560   |
|        | Anti-S SARS-CoV-2 IgG negative | 5.137 | 0.023   |
| Step 2 | Moderate disease               | 4.873 | 0.087   |
|        | Severe disease                 | 0.293 | 0.588   |
|        | Critical disease               | 1.930 | 0.165   |
|        | BMI (kg.m <sup>-2</sup> )      | 2.367 | 0.124   |
|        | CRP (mg/l)                     | 0.510 | 0.475   |
|        | IL6 (ng/l)                     | 0.002 | 0.964   |
|        | N/L ratio                      | 2.607 | 0.106   |
|        | D-Dimer (mg/l)                 | 0.167 | 0.683   |
|        | Comorbidity number (n)         | 0.305 | 0.581   |
|        | Baricitinib                    | 0.003 | 0.959   |

BMI: body mass index; CRP: C-reactive protein; IgG: immunoglobulin G, IL-6: interleukin 6; n: number, N/L ratio: neutrophil-to-lymphocyte ratio; p-value: probability (univariate), SE: standard error.

**Supplementary Table S14:** Collinearity analysis of variables in the association with in-hospital death.

|                           | tolerance | VIF   |
|---------------------------|-----------|-------|
| Disease severity          | 0.915     | 1.093 |
| Duration of symptoms      | 0.995     | 1.005 |
| Age (years)               | 0.664     | 1.506 |
| BMI (kg.m <sup>-2</sup> ) | 0.901     | 1.109 |
| CRP (mg/l)                | 0.775     | 1.290 |
| IL-6 (ng/l)               | 0.874     | 1.145 |
| N/L ratio                 | 0.723     | 1.383 |

|                            |       |       |
|----------------------------|-------|-------|
| D-Dimer (mg/l)             | 0.916 | 1.092 |
| Comorbidity number (n)     | 0.705 | 1.418 |
| Baricitnib                 | 0.922 | 1.085 |
| Anti-S SARS-CoV-2 negative | 0.941 | 1.063 |

BMI: body mass index; CRP: C-reactive protein; IgG: immunoglobulin G, IL-6: interleukin 6; n: number, N/L ratio: neutrophil-to-lymphocyte ratio; p-value: probability (univariate), SE: standard error; VIF: variance inflation factor

**Supplementary Table S15:** Collinearity analysis of variables in association with death during the follow-up.

|                            | tolerance | VIF   |
|----------------------------|-----------|-------|
| Disease severity           | 0.927     | 1.079 |
| Duration of symptoms       | 0.984     | 1.016 |
| Age (years)                | 0.692     | 1.446 |
| BMI (kg.m <sup>-2</sup> )  | 0.903     | 1.108 |
| CRP (mg/l)                 | 0.760     | 1.316 |
| IL-6 (ng/l)                | 0.813     | 1.230 |
| N/L ratio                  | 0.682     | 1.467 |
| D-Dimer (mg/l)             | 0.887     | 1.127 |
| Comorbidity number (n)     | 0.721     | 1.386 |
| Baricitnib                 | 0.917     | 1.091 |
| Anti-S SARS-CoV-2 negative | 0.939     | 1.065 |

BMI: body mass index; CRP: C-reactive protein; IgG: immunoglobulin G, IL-6: interleukin 6; n: number, N/L ratio: neutrophil-to-lymphocyte ratio; p-value: probability (univariate), SE: standard error; VIF: variance inflation factor.
